# Supplementary material for: Estimating microplastic emissions from offshore wind turbine blades in the Dutch North Sea
Source: Copernicus journal article supplement (doi:10.5194/wes-10-1123-2025), 2025-06-13
Supplement: Supplementary file 1 [file wes-10-1123-2025-supplement.zip]

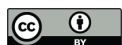

*Supplement of*

## **Estimating microplastic emissions from offshore wind turbine blades in the Dutch North Sea**

**Marco Caboni et al.**

*Correspondence to:* Marco Caboni ([marco.caboni@tno.nl](mailto:marco.caboni@tno.nl))

- [wes-10-1123-2025-supplement-title-page.pdf](#)
- [Supplement Table S1.xlsx](#)

The copyright of individual parts of the supplement might differ from the article licence.
